# Supplementary material for: Erythrocyte-derived extracellular vesicles induce endothelial dysfunction through arginase-1 and oxidative stress in type 2 diabetes
Source: JCI journal article supplement (doi:10.1172/jci180900), 2025-03-20

**Figure 4A**

**Arginase-1**

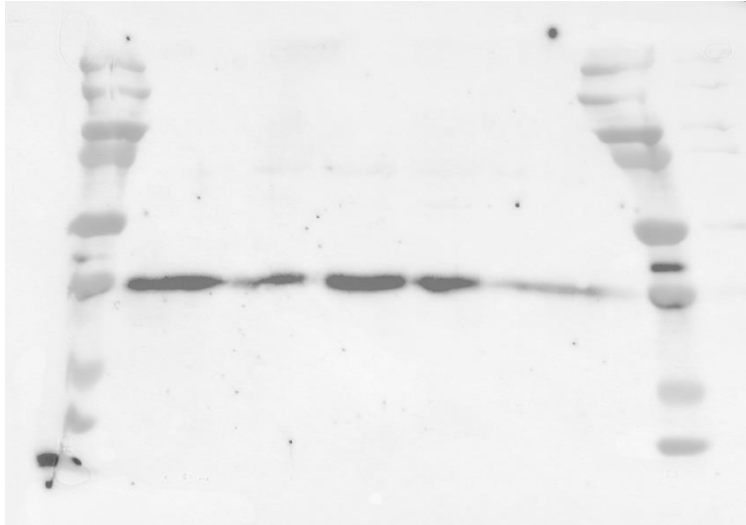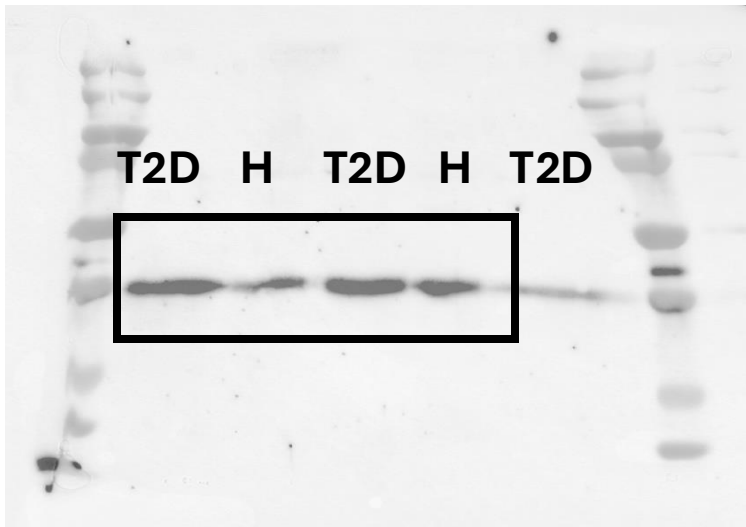

**GAPDH**

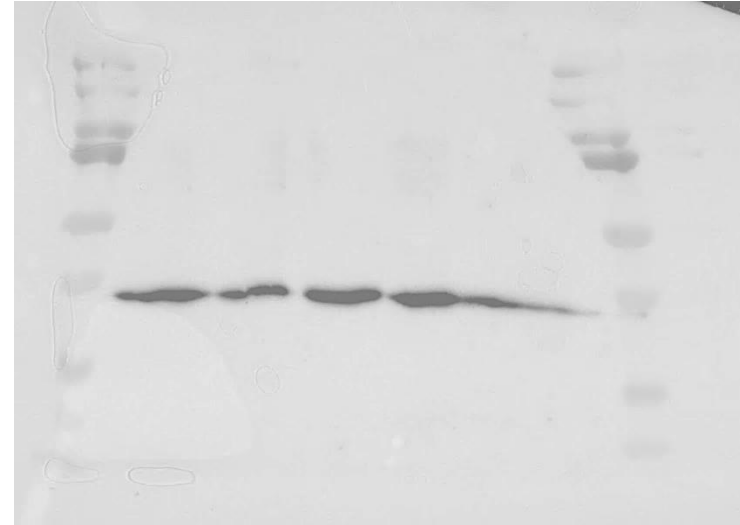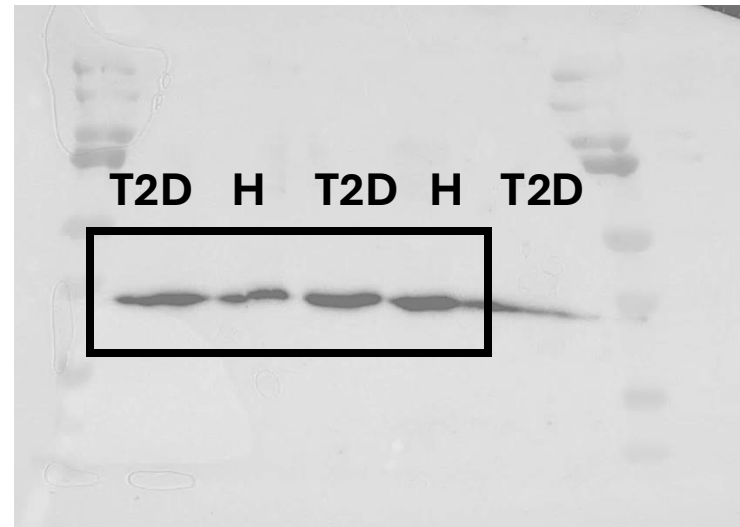

Supplement: sd2 [file 2]
